# Supplementary material for: Cyano-modified poly(triazine imide) with extended π-conjugation for photocatalytic biological cofactor regeneration
Source: Royal Society of Chemistry journal article supplement (doi:10.1039/d3cy01708g), 2024-01-01
Supplement: d3cy01708g1.pdf [file d3cy01708g1.pdf]

Supplementary Material for

# Cyano-modified poly(triazine imide) with extended $\pi$ -conjugation for photocatalytic biological cofactor regeneration

*Jianhua Liu,<sup>a,b</sup> Jiashu Li,<sup>a,b</sup> Fangshu Xing<sup>b, \*</sup> and Jian Liu<sup>a, b, \*</sup>*

<sup>a</sup> College of Materials Science and Engineering, Qingdao University of Science and Technology, Qingdao 266042, P. R. China

<sup>b</sup> Qingdao Institute of Bioenergy and Bioprocess Technology, Chinese Academy of Sciences, Shandong Energy Institute, Qingdao New Energy Shandong Laboratory, Qingdao 266101, P. R. China

\*Corresponding authors.

E-mail addresses: xingfs@qibebt.ac.cn; liujian@qibebt.ac.cn

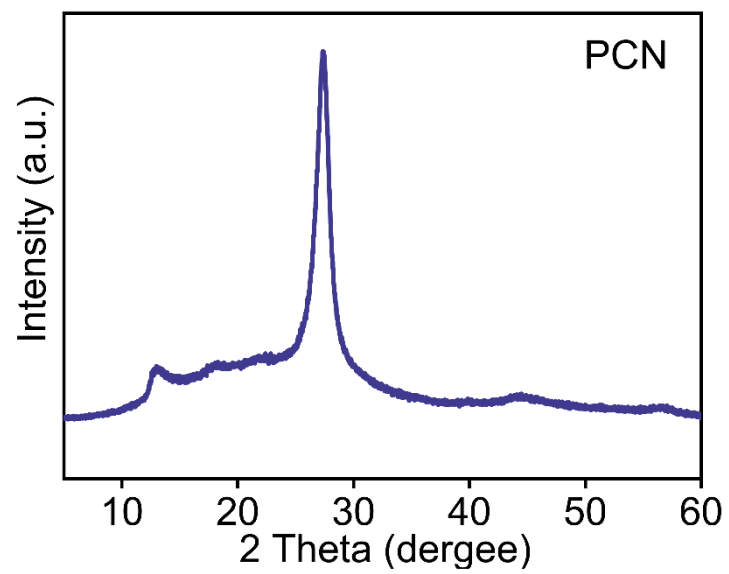

**Fig. S1.** XRD pattern of PCN.

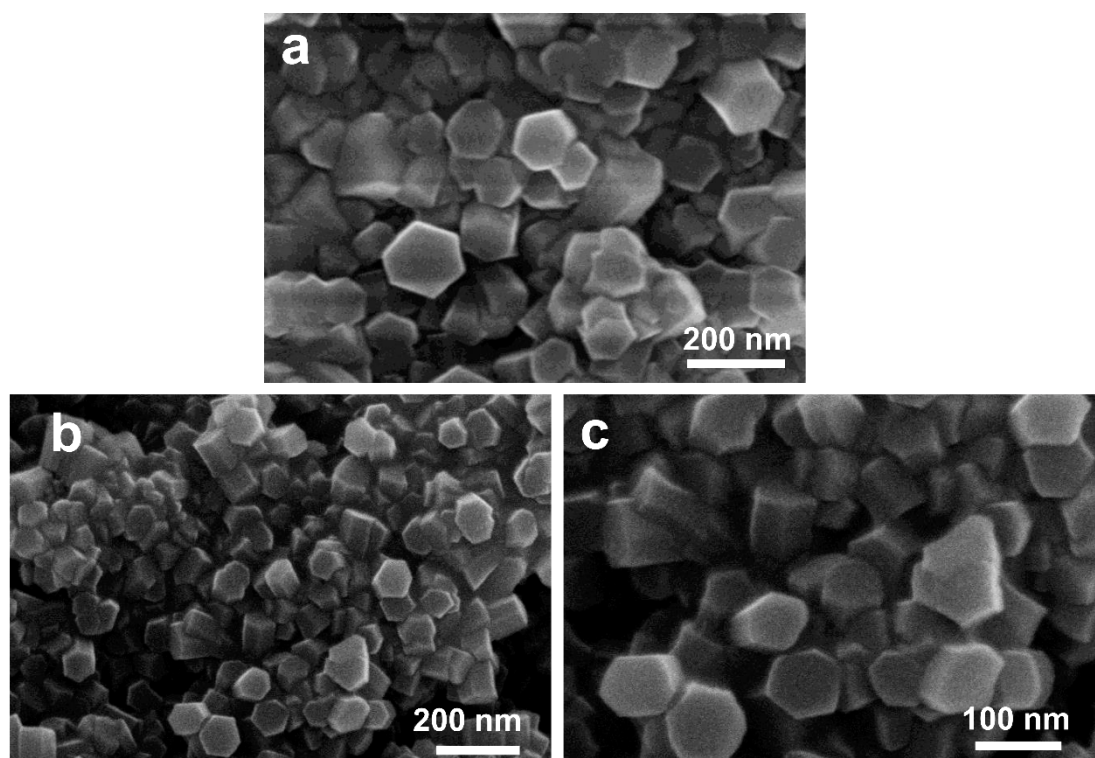

**Fig. S2.** (a) SEM images of PTI and (b, c) D-PTI-350 samples.

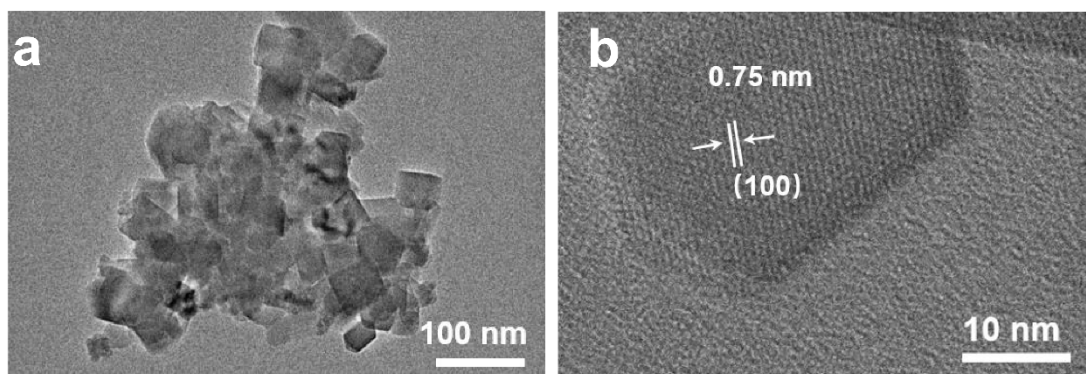

**Fig. S3.** (a) TEM and (b) HRTEM images of PTI.

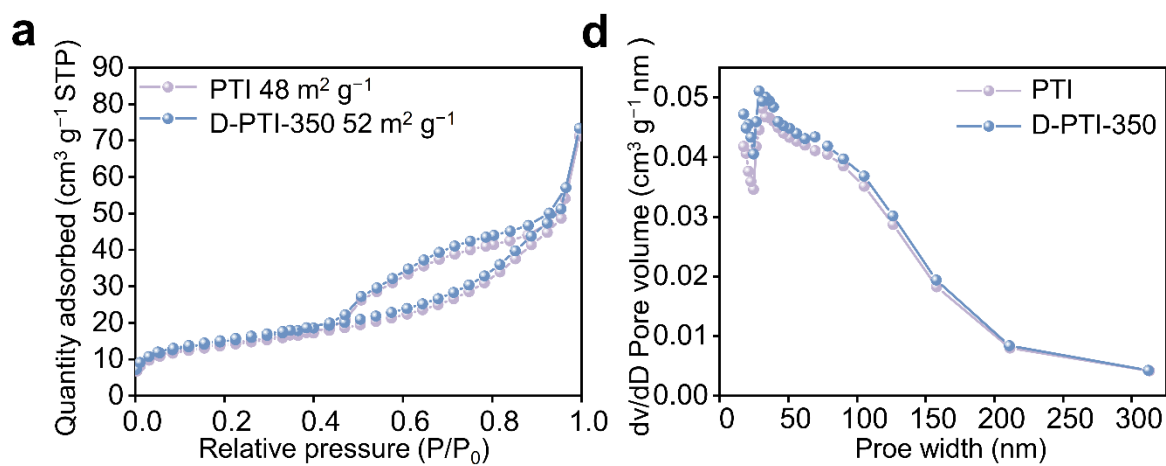

**Fig. S4.** (a)  $\text{N}_2$  adsorption–desorption isotherms and (b) corresponding pore size distribution curves of PTI and D-PTI-350, respectively.

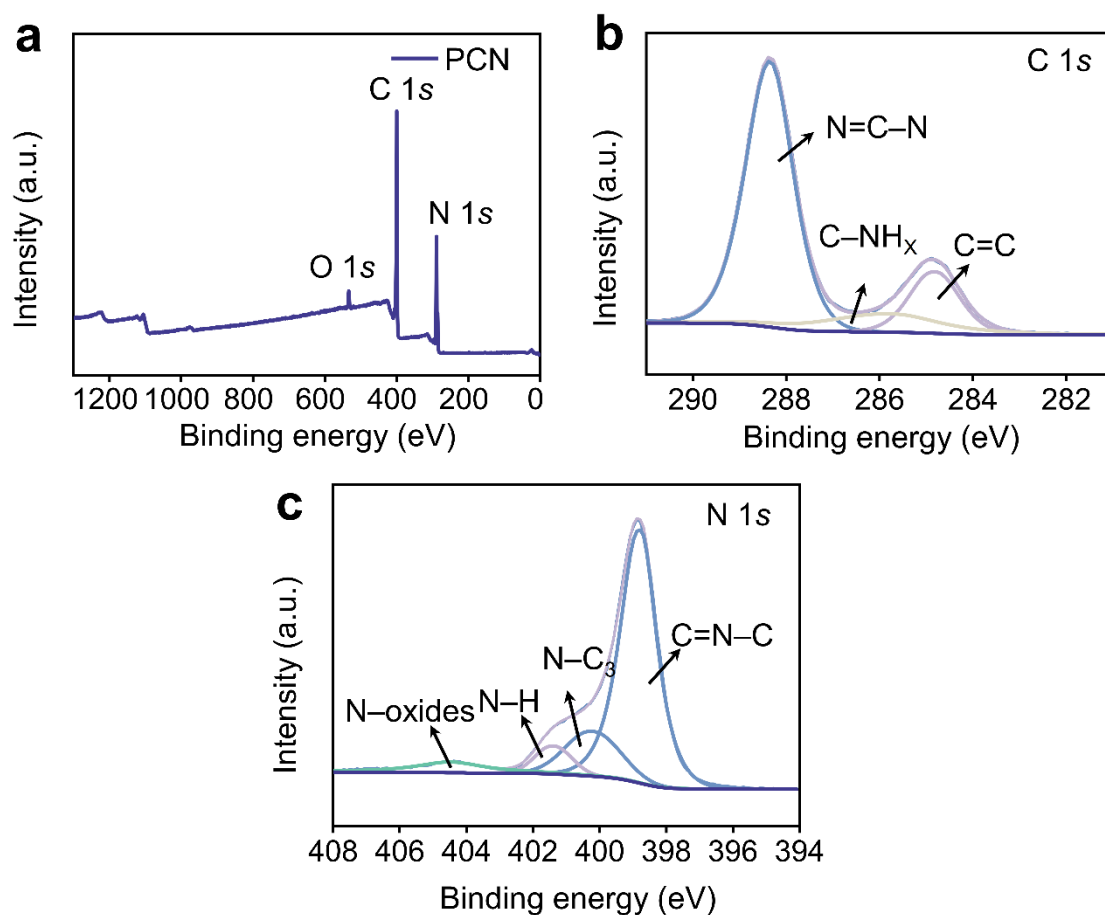

**Fig. S5.** (a) Survey XPS spectra, (b) C 1s, and (c) N 1s high-resolution spectra of as-prepared PCN.

The PCN sample was composed of two elements: C and N. The C 1s spectrum in the PCN sample can be deconvoluted into three peaks located at binding energy of 288.2, 286.3 and 284.8 eV, which are attributed to the C in the aromatic N=C=N moiety, the C in the C-NH<sub>x</sub> (x = 1 or 2) moieties at the edges of the tri-s-triazine units and the C in the amorphous carbon and aromatic C=C bonds used as calibration standards, respectively.<sup>1</sup> In the N 1s spectrum, the fitted peaks at 398.8, 399.5, 401.0 and 404.3 eV correspond to the pyridinic N in the tri-s-triazine units, graphitic N, N-H species and  $\pi$ - $\pi^*$  excitations in conjugated aromatic rings, respectively.<sup>2</sup> These results are consistent with the typical XPS characteristics of PCN samples.

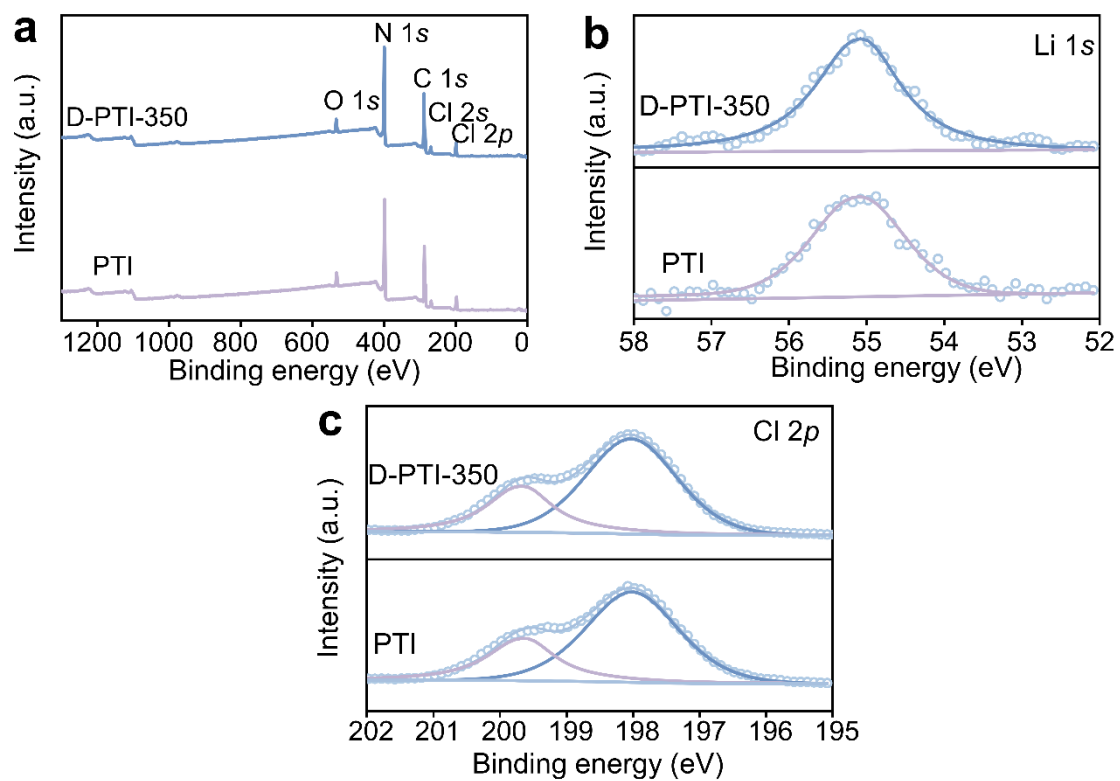

**Fig. S6.** (a) Survey XPS spectra, (b) Li 1s, and (c) Cl 2p XPS high-resolution spectra of as-prepared PTI and D-PTI-350.

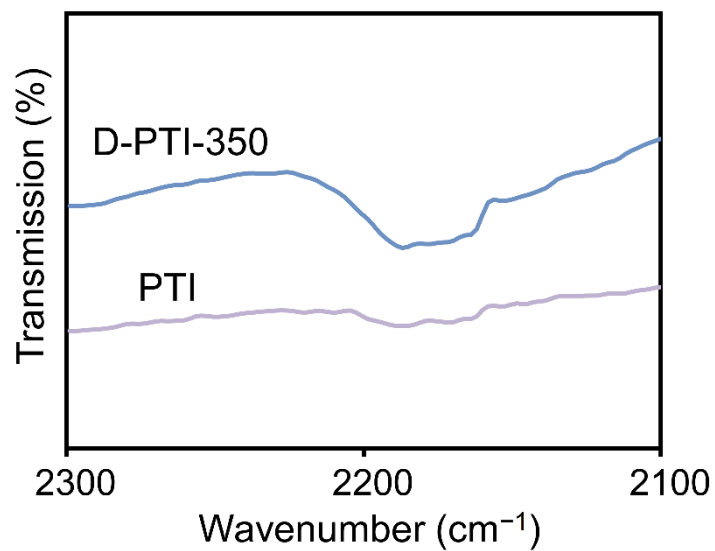

**Fig. S7.** Enlarged FT-IR spectra of PTI and D-PTI-350.

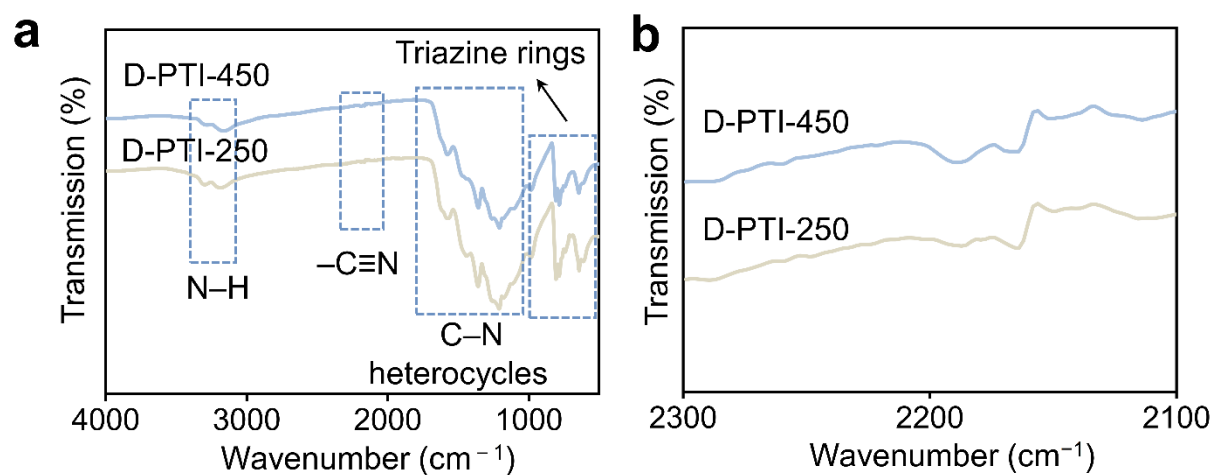

**Fig. S8.** (a) FT-IR spectra and (b) Enlarged FT-IR spectra of D-PTI-250 and D-PTI-450, respectively.

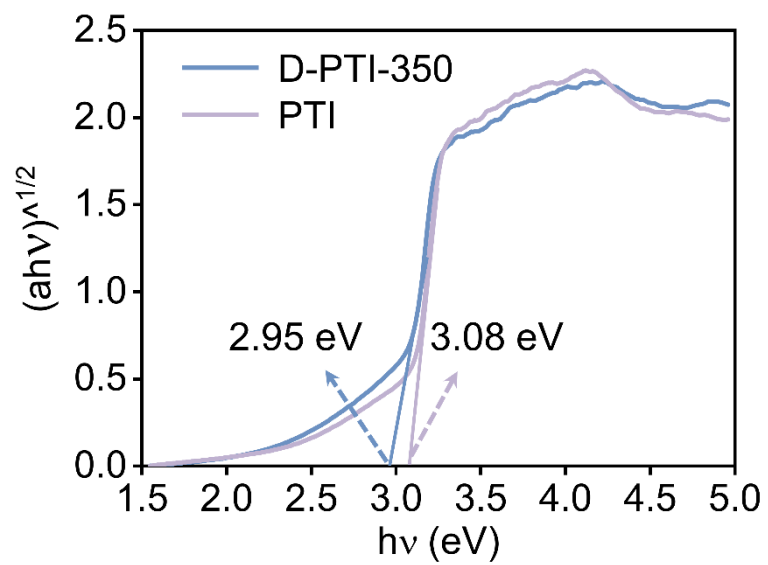

**Fig. S9.** Bandgap of PTI and D-PTI-350 determined by Tauc plots.

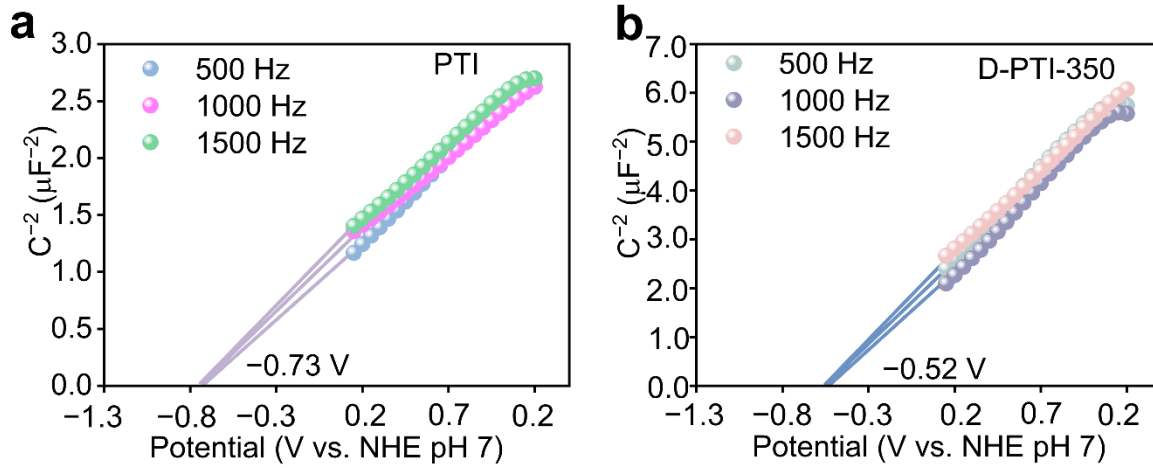

**Fig. S10.** The Mott-Schottky plots of (a) PTI and (b) D-PTI-350.

The flat band potentials of PTI and D-PTI-350 were determined by the Mott–Schottky (M–S) equation:<sup>1, 3</sup>

$$\frac{1}{C_{SC}^2} = \frac{2}{\epsilon_r \epsilon_0 A^2 N} \left( E - E_{fb} - \frac{kT}{e} \right)$$

where  $\epsilon_r$  is the relative dielectric constant of the semiconductor,  $\epsilon_0$  is the vacuum dielectric constant,  $e$  is the elementary charge,  $A$  is the surface area,  $N$  is the free carrier density,  $k$  is the Boltzmann constant,  $T$  is the temperature,  $E$  is the applied potential and  $E_{fb}$  is the flat band potential.<sup>4</sup> By taking the x-intercept of a linear fit to the Mott–Schottky plot ( $E_{fb} = E - \frac{kT}{e} \approx E$ ), the flat band potential of PTI and D-PTI could be estimated as  $-0.73$  and  $-0.52$  V (vs. NHE, pH 7). Because the conduction band value of the semiconductor is approximate to the flat band potential,<sup>5</sup> we could further obtain the conduction band minimum ( $E_{CBM}$ ) of PTI and D-PTI-350 as  $-0.73$  and  $-0.52$  V (vs. NHE, pH 7).



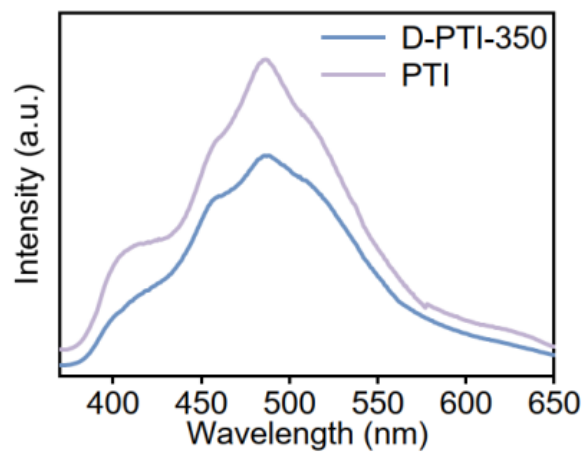

**Fig. S11.** Room-temperature PL spectra of PTI and D-PTI-350.

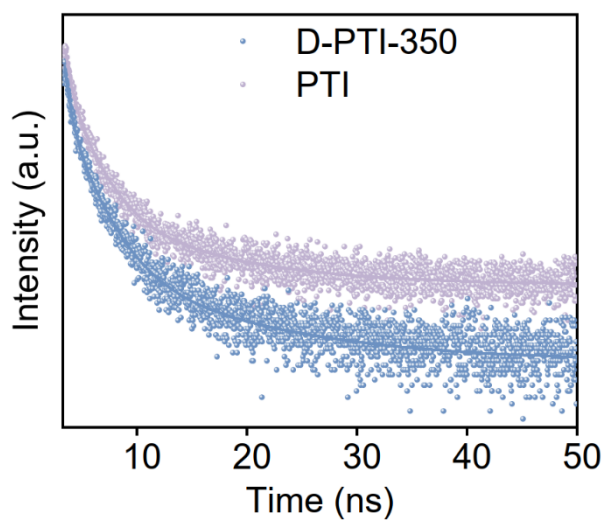

**Fig. S12.** Time-resolved PL spectra of PTI and D-PTI-350.

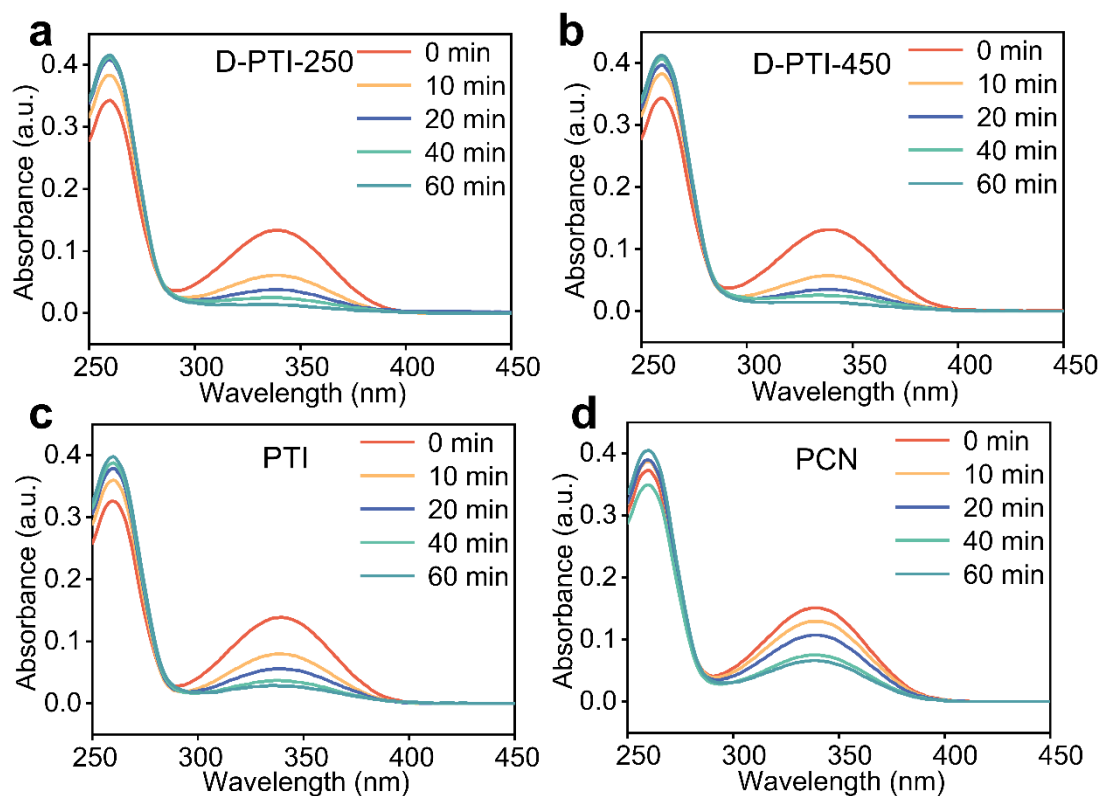

**Fig. S13.** UV-vis absorbance profile of NAD<sup>+</sup> regeneration over (a) D-PTI-250, (b) D-PTI-450, (c) PTI, and (d) PCN, respectively.

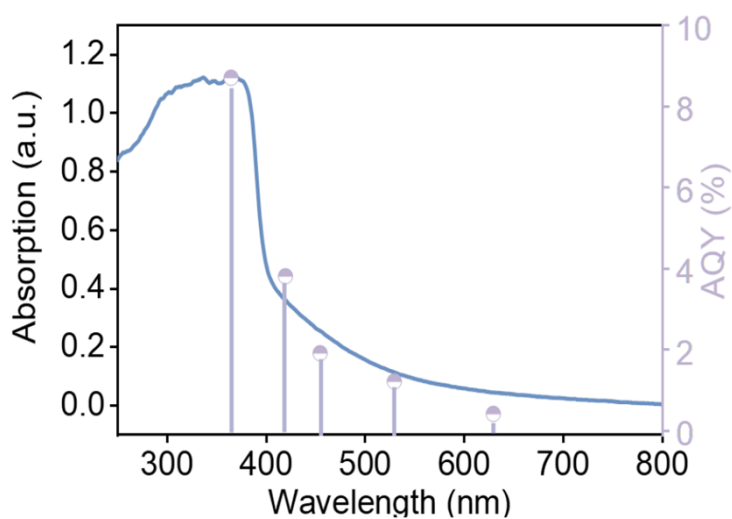

**Fig. S14.** Action spectra and wavelength-dependent apparent quantum efficiency over D-PTI-350.

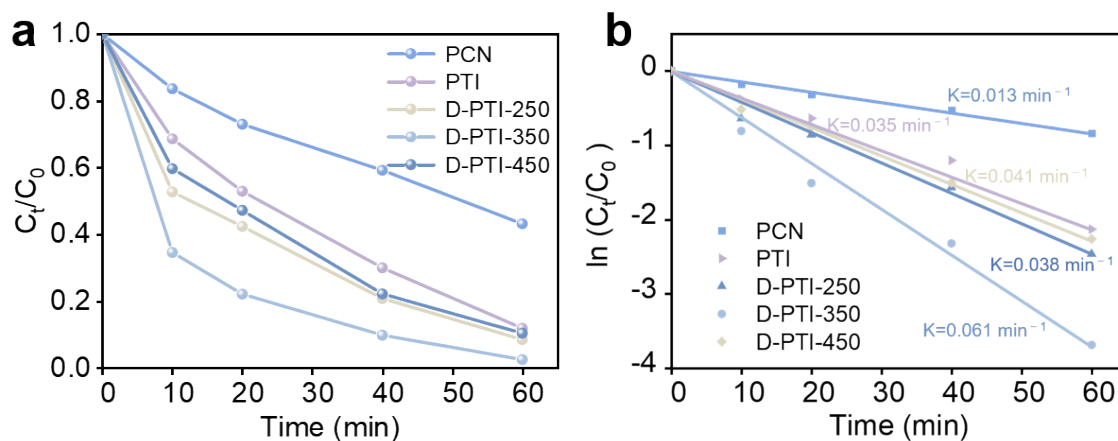

**Fig. S15.** (a) Photocatalytic activities for NADH oxidation over PCN, PTI, and D-PTI samples. (b) Rate constants of the catalytic oxidation reaction of NADH obtained with different catalysts through a plot of  $\ln(C_t/C_0)$  versus time ( $T = 310$  K).

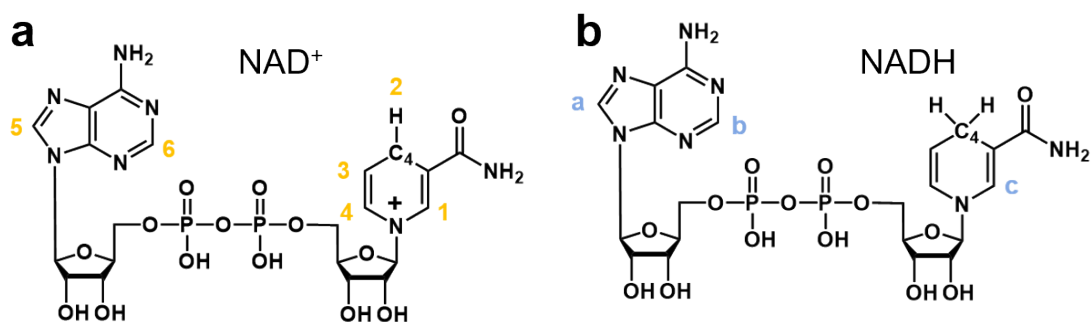

**Fig. S16.** The structure of (a) NAD<sup>+</sup> and (b) NADH.

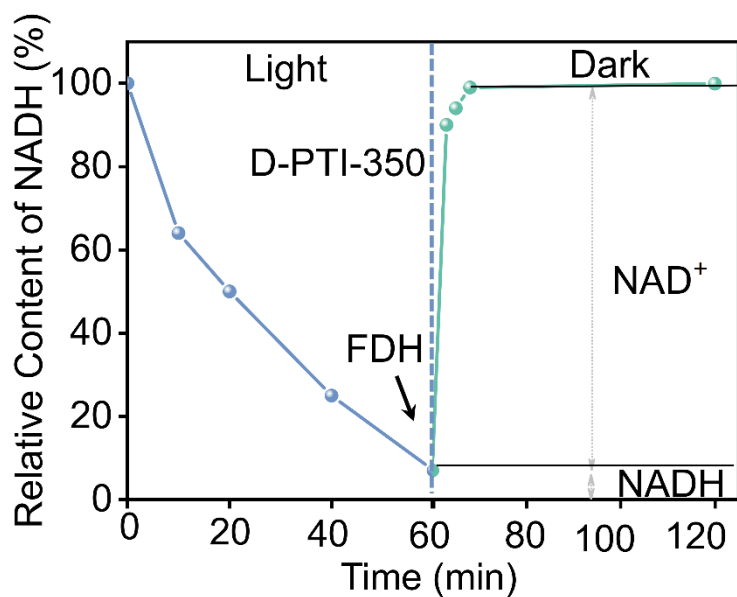

**Fig. S17.** Kinetic curve of NADH oxidation by D-PTI-350 and selective reduction of regenerated  $\text{NAD}^+$  to 1,4-NADH by FDH after photocatalytic oxidation.

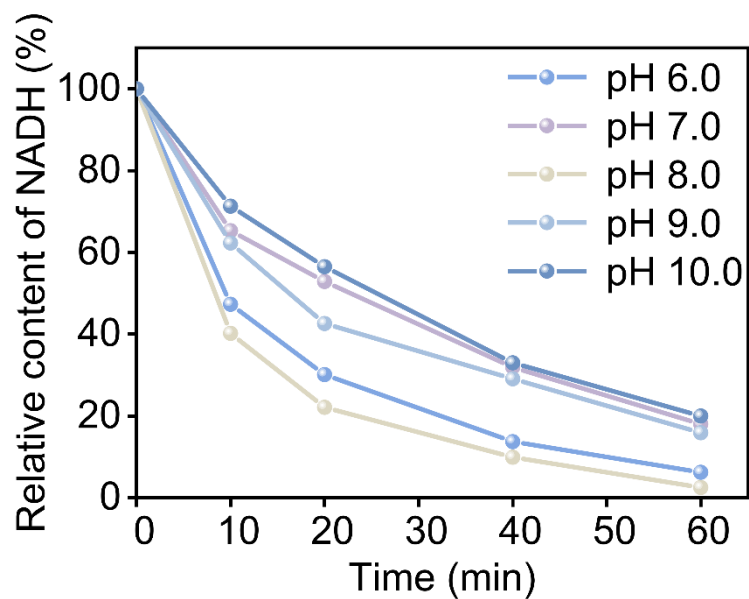

**Fig. S18.** Catalytic oxidation of NADH by D-PTI-350 at different pH.

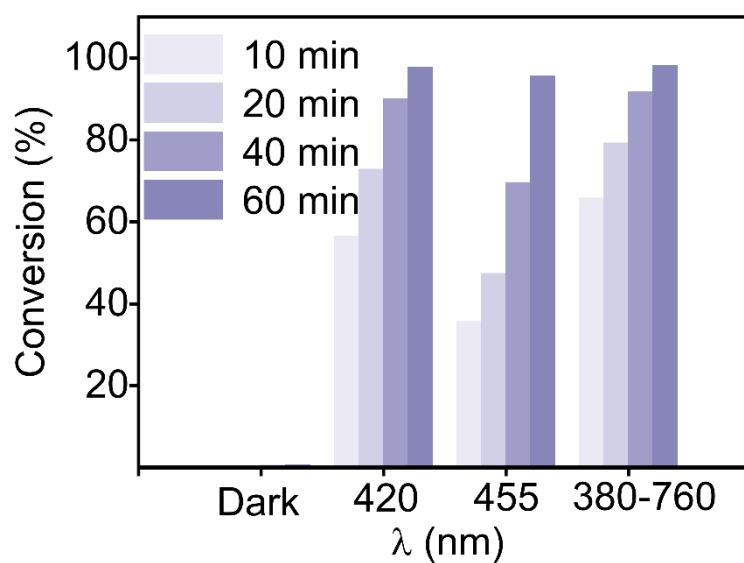

**Fig. S19.** Catalytic oxidation of NADH by D-PTI-350 at different wavelengths.

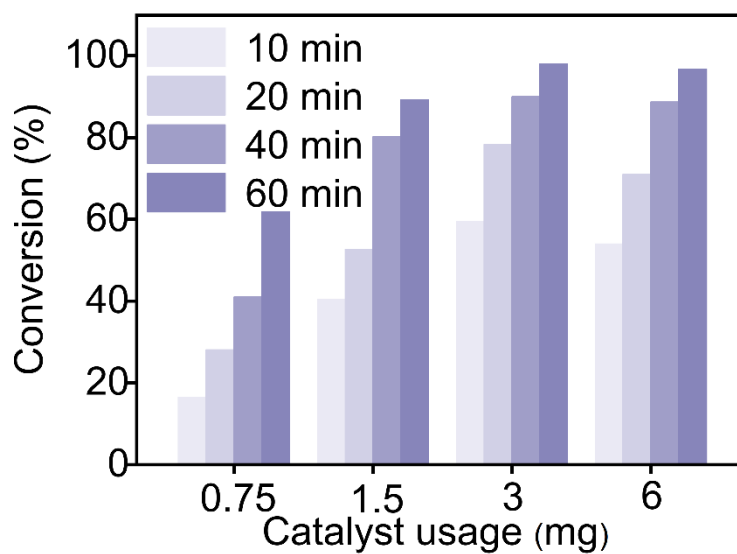

**Fig. S20.** Catalytic oxidation of NADH by D-PTI-350 at different catalyst usage.

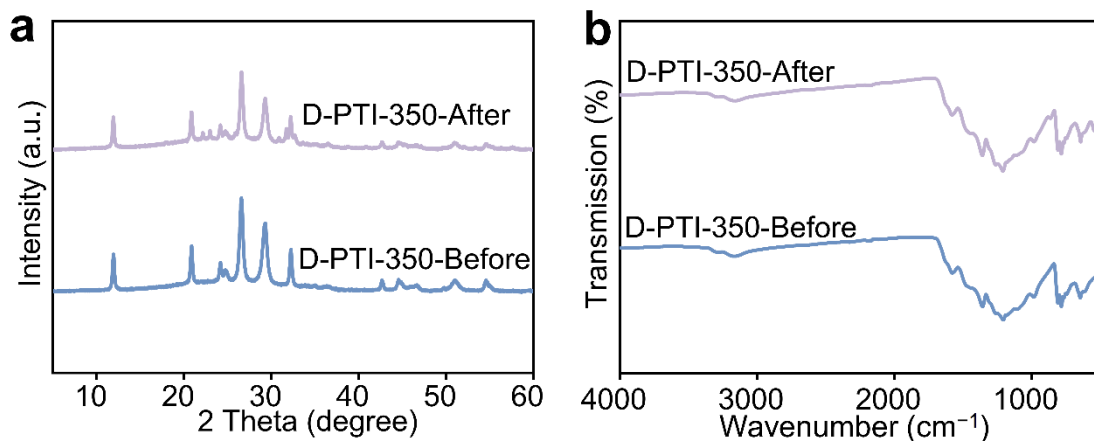

**Fig. S21.** (a) XRD and (b) FT-TR characterizations of D-PTI-350 before and after the reaction.

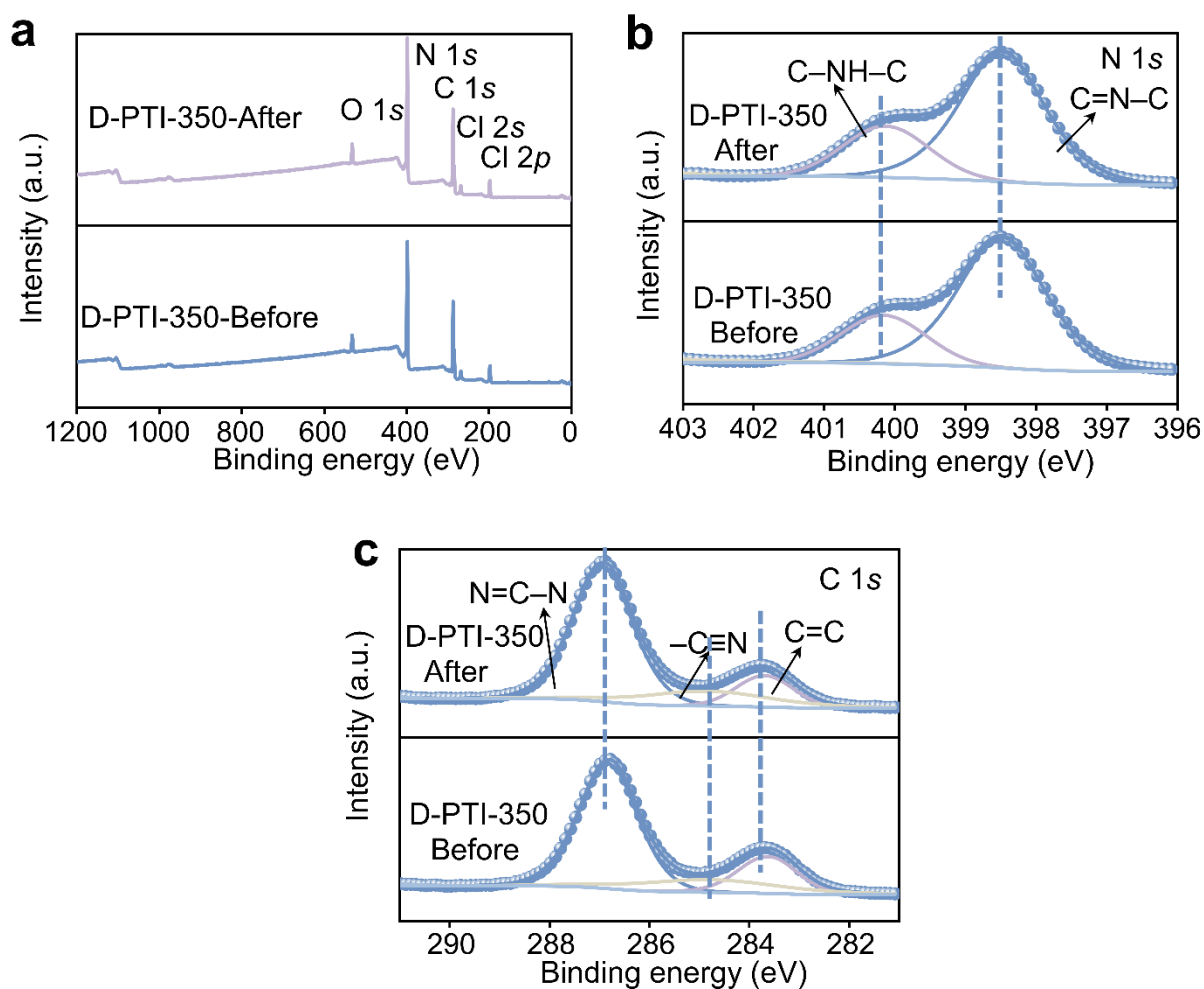

**Fig. S22.** (a) Survey XPS spectra, (b) Li 1s and (c) Cl 2p XPS high-resolution spectra of D-PTI-350 before and after the reaction.

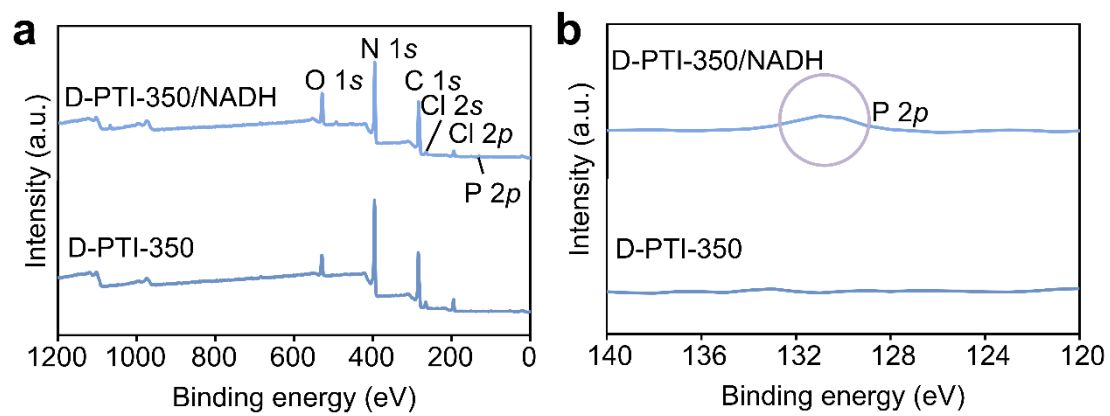

**Fig. S23.** (a) Survey XPS spectra and (b) P 2p spectra of D-PTI-350 after NADH adsorption.

**Table S1.** Comparative study on the oxidation performance of NADH by different photocatalysts.

| Entry | Catalyst          | Time<br>[min] | Reactant solution                  | Light source<br>[nm] | T<br>[°C] | Con.<br>[%] | Sel.<br>[%] | Ref.      |
|-------|-------------------|---------------|------------------------------------|----------------------|-----------|-------------|-------------|-----------|
| 1     | D-PTI             | 60            | PBS, Air                           | 380-700              | 37        | 98.2        | 99.9        | This work |
| 2     | NP-CS             | 60            | PBS, Air                           | >420                 | 37        | 99.9        | 99.9        | 6         |
| 3     | CdS               | 30            | PBS, Air                           | >420                 | 37        | 70.1        | 82.3        | 7         |
| 4     | Vesicle           | 60            | PBS, Air                           | 380~700              | 37        | 99.9        | 99.9        | 8         |
| 5     | Fe/CN             | 40            | PBS, Air                           | >420                 | 37        | 67.5        | 78.8        | 9         |
| 6     | CMP-NPs           | 45            | PBS, Air                           | 420                  | 37        | 75.0        | 99.9        | 10        |
| 7     | B-BO <sub>3</sub> | 60            | PBS, Air                           | >420                 | 37        | 75.0        | -           | 11        |
| 8     | S-NC              | 30            | PBS, Air                           | -                    | 25        | 99.9        | 99.9        | 12        |
| 9     | Cp*Ir-Complex     | 30            | PBS, Air                           | -                    | 25        | 96.0        | 99.9        | 13        |
| 10    | CdS-140           | 120           | PBS, Air                           | 380~700              | 37        | 99.9        | -           | 14        |
| 11    | CuAsp             | 10            | PBS, H <sub>2</sub> O <sub>2</sub> | -                    | 25        | 85.0        | 20.0        | 15        |
| 12    | N-CNTs            | 30            | PBS, Air                           | -                    | 25        | 60.0        | 80.0        | 16        |
| 13    | NanoNOx           | 90            | PBS, Air                           | -                    | 25        | 99.9        | 99.9        | 17        |



**Table S2.** The element content in different chemical environments derived from XPS results.

| Sample    | N=C-N (%) | C=C (%) | -C≡N (%) | C=N-C (%) | C-NH-C (%) |
|-----------|-----------|---------|----------|-----------|------------|
| PTI       | 67.59     | 32.41   | -        | 47.48     | 52.52      |
| D-PTI-350 | 66.91     | 21.77   | 11.32    | 44.79     | 55.21      |

**Table S3.** Fitting parameters for the time-resolved PL spectra of PTI and D-PTI-350.

| Sample    | $\tau_1$       | $\tau_2$       | $\tau_3$       | $\tau_{ave}$ | Goodness of fit |
|-----------|----------------|----------------|----------------|--------------|-----------------|
| PTI       | 0.522 (7.43%)  | 2.369 (48.42%) | 10.20 (44.36%) | 8.54         | 1.029           |
| D-PTI-350 | 0.516 (10.00%) | 2.618 (50.04%) | 12.34 (39.95%) | 11.0         | 1.037           |

## References

1. Arthur, J., Nozik, Rüdiger and Memming, *J. Phys. Chem. B*, 1996, **100**, 13061-13078.
2. Z. Zhang, W. Liu, Y. Zhang, J. Bai and J. Liu, *ACS Catal.*, 2020, **11**, 313-322.
3. K. Gelderman, L. Lee and S. Donne, *J. Chem. Educ.*, 2007, **84**, 685.
4. T. Han, X. Cao, K. Sun, Q. Peng, C. Ye, A. Huang, W.-C. Cheong, Z. Chen, R. Lin, D. Zhao, X. Tan, Z. Zhuang, C. Chen, D. Wang and Y. Li, *Nat. Commun.*, 2021, **12**, 4952.
5. S. J. Hong, S. Lee, J. S. Jang and J. S. Lee, *Energy Environ. Sci.*, 2011, **4**, 1781-1787.
6. W. Wei, F. Mazzotta, I. Lieberwirth, K. Landfester, C. T. J. Ferguson and K. A. I. Zhang, *J. Am. Chem. Soc.*, 2022, **144**, 7320-7326.
7. S. Zhang, J. Shi, Y. Chen, Q. Huo, W. Li, Y. Wu, Y. Sun, Y. Zhang, X. Wang and Z. Jiang, *ACS Catal.*, 2020, **10**, 4967-4972.
8. N. Zhang, S. Trepout, H. Chen and M. H. Li, *J. Am. Chem. Soc.*, 2023, **145**, 288-299.
9. Y. Zhang, X. Huang, J. Li, G. Lin, W. Liu, Z. Chen and J. Liu, *Chem. Res. Chin. Univ.*, 2020, **36**, 1076-1082.
10. S.-M. Jo, K. A. I. Zhang, F. R. Wurm and K. Landfester, *ACS Appl. Mat. Interfaces* 2020, **12**, 25625-25632.
11. B. C. Ma, L. Caire da Silva, S. M. Jo, F. R. Wurm, M. B. Bannwarth, K. A. I. Zhang, K. Sundmacher and K. Landfester, *Chembiochem*, 2019, **20**, 2593-2596.
12. D. Zhu, M. Zhang, C. Wang, P. Gai and F. Li, *Chem. Mater.*, 2022, **34**, 11072-11080.
13. Y. Maenaka, T. Suenobu and S. Fukuzumi, *J. Am. Chem. Soc.*, 2011, **134**, 367-374.
14. H. Wang, J. Chen, Q. Dong, X. Jia, D. Li, J. Wang and E. Wang, *Nano Res.*, 2022, **15**, 5256-5261.
15. S. Liu, X. Wu, J. Xiong, X. Yuan, M. H. Zong and W. Y. Lou, *Mater. Chem. Front.*, 2022, **6**, 3391-3401.
16. H. Wang, J. Chen, Q. Dong, X. Sun, Q. Liu, D. Li, E. Wang and J. Wang, *Nano Res.*, 2023, **16**, 6615-6621.
17. A. Rodrigue-Abetxuko, A. Reifs, D. Sánchez-deAlcázar and A. Beloqui, *Angew. Chem. Int. Ed.*, 2022, **134**, e202206926.
